# Supplementary material for: Recombination-Induced Tag Exchange (RITE) Cassette Series to Monitor Protein Dynamics in Saccharomyces cerevisiae
Source: PubMed Central journal article supplement (PMC3737166; doi:10.1534/g3.113.006213), 2013-08-01
Supplement: supp_g3.113.006213_006213SI.pdf [file supp_g3.113.006213_006213SI.pdf]

**Recombination-Induced Tag Exchange (RITE) cassette series to monitor protein dynamics in *Saccharomyces cerevisiae***

Marit Terweij<sup>\*</sup>, Tibor van Welsem<sup>\*</sup>, Sjoerd van Deventer<sup>§</sup>, Kitty F. Verzijlbergen<sup>\*,1</sup>, Victoria Menendez-Benito<sup>§</sup>, David Ontoso<sup>†</sup>, Pedro San-Segundo<sup>†</sup>, Jacques Neefjes<sup>§</sup>, Fred van Leeuwen<sup>\*</sup>

<sup>\*</sup>Division of Gene Regulation and <sup>§</sup>Division of Cell Biology, Netherlands Cancer Institute, Netherlands Proteomics Centre, 1066CX Amsterdam, The Netherlands

<sup>†</sup>Instituto de Biología Funcional y Genómica, Consejo Superior de Investigaciones Científicas and University of Salamanca, 37007 Salamanca, Spain

<sup>1</sup>Present address: Wellcome Trust Centre for Cell Biology, University of Edinburgh, Edinburgh EH9 3JR, UK

**DOI: 10.1534/g3.113.006213**

File S1

Sequences of RITE cassettes

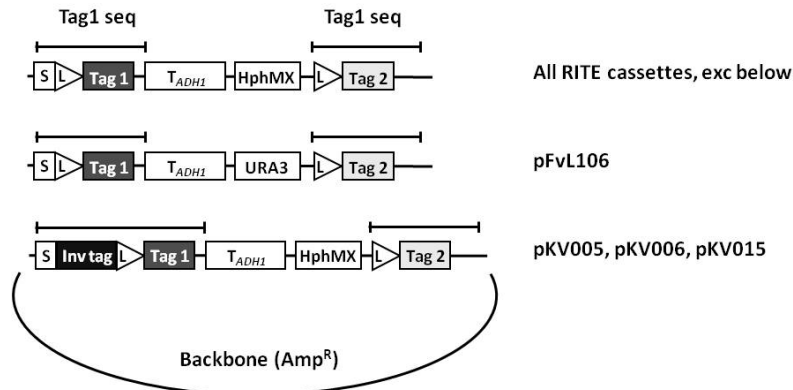

pKV005

>TAG seq1:

GGTGGATCTGGTGGATCTGCTAGCGAACAAAAGTTGATTTCTGAAGAAGATTTGAGCGCTATAACTTCGTATAAT  
GTATGCTATACGAAGTTATCAGGTACCTACCCATACGATGTTTCTGACTATGCGACTAGTTAA

>TAG seq2:

TCTAGAATAACTTCGTATAATGTATGCTATACGAAGTTATCAGTCGACATGGCAAGCATGACTGGTGGACAGCAA  
ATGGGTTGTACATAAGCGGCCGCGCATGCAAGCTTTTGTTCCTTTAGTGAGGGTTAATTTTCGAGCTTGGCGTAA  
TCATGGTCATAGCTGTTTCTGTGTGAAATTGTTATCCGC

pKV006

>TAG seq1:

GGTGGATCTGGTGGATCTGCTAGCGGTAAGCCTATCCCTAACCCCTCTCCTCGGTCTCGATTCTACGAGCGCTATA  
ACTTCGTATAATGTATGCTATACGAAGTTATCAGGTACCTACCCATACGATGTTTCTGACTATGCGACTAGTTAA

>TAG seq2:

TCTAGAATAACTTCGTATAATGTATGCTATACGAAGTTATCAGTCGACATGGCAAGCATGACTGGTGGACAGCAA  
ATGGGTTGTACATAAGCGGCCGCGCATGCAAGCTTTTGTTCCTTTAGTGAGGGTTAATTTTCGAGCTTGGCGTAA  
TCATGGTCATAGCTGTTTCTGTGTGAAATTGTTATCCGC

pKV014

>TAG seq1:

GGTGGATCTGGTGGATCTATAACTTCGTATAATGTATGCTATACGAAGTTATCAGGTACCTACCCATACGATGTT  
CCTGACTATGCGACTAGCTATCCCTATGACGTCGCGGACTATGCAGGATATCCATATGACGTTCCAGATTACGCT  
ACTAGTTAA

>TAG seq2:

TCTAGAATAACTTCGTATAATGTATGCTATACGAAGTTATCAGTCGACATGGCAAGCATGACTGGTGGACAGCAA  
ATGGGTTGTACTATGGCTTCTATGACAGGAGGTC AACAGATGGGAGGAATGGCCTCAATGACCGTGGCCAGCAA  
ATGGGATGTACAATGGCTCCTCCGAGGACGTCATCAAGGAGTTTCATGCGCTTCAAGGTGCGCATGGAGGGCTCC  
GTGAACGGCCACGAGTTCGAGATCGAGGGCGAGGGCCGCCCCCTACGAGGGCACCCAGACCGCCAAGCTG  
AAGGTGACCAAGGGCGCCCCCTGCCCTTCGCTGGGACATCCTGTCCCCCTCAGTTCCAGTACGGCTCCAAGGCC  
TACGTGAAGCACCCCGCCGACATCCCCGACTACTTGAAGCTGTCTTCCCCGAGGGCTTCAAGTGGGAGCGGTG  
ATGAACTTCGAGGACGGCGGTGGTGACCGTGACCCAGGACTCCTCCCTGCAGGACGGCGAGTTCATCTACAAG  
GTGAAGCTGCGCGCACCAACTTCCCCCTCCGACGGCCCCGTAATGCAGAAGAAGACCATGGGCTGGGAGGCCTCC  
ACCGAGCGGATGTACCCCGAGGACGGCGCCCTGAAGGGCGAGATCAAGATGAGGCTGAAGCTGAAGGACGGCGGC  
CACTACGACGCCGAGGTCAAGACCACCTACATGGCCAAGAAGCCCGTGCAGCTGCCCGGCGCCTACAAGACCGAC  
ATCAAGCTGGACATCACCTCCACAAACGAGGACTACACCATCGTGGAACAGTACGAGCGCGCCGAGGGCCGCCAC  
TCCACCGCGCCAAGCTTTTGTTCCTTTAGTGAGGGTTAATTTTCGAGCTTGGCGTAATCATGGTCATAGCTGTT  
TCTGTGTGAAATTGTTATCCGC

pKV015

>TAG seq1:

GGTGGATCTGGTGGATCTGCTAGCGGTAAGCCTATCCCTAACCCCTCTCCTCGGTCTCGATTCTACGAGCGCTATA  
ACTTCGTATAATGTATGCTATACGAAGTTATCAGGTACCTACCCATACGATGTTTCTGACTATGCGACTAGTATG

TCTAAAGGTGAAGAATTATTCCTGCTGTTGTCCCAATTTTGGTTGAATTAGATGGTGATGTTAATGGTCACAAA  
TTTTCTGTCTCCGGTGAAGGTGAAGGTGATGCTACTTACGGTAAATTGACCTTAAAATTTATTTGTACTACTGGT  
AAATTGCCAGTTCATGGCCAACCTTAGTCACTACTTTAACTTATGGTGTCAATGTTTTTCTAGATACCCAGAT  
CATATGAAACAACATGACTTTTTCAAGTCTGCCATGCCAGAAGTTATGTTCAAGAAAAGAACTATTTTTTTCAAA  
GATGACGGTAACTACAAGACCAGAGCTGAAGTCAAGTTTGAAGGTGATACCTTAGTTAATAGAATCGAATTA  
GGTATTGATTTTAAAGAAGATGGTAACATTTTAGGTACAAAATTGGAATACAACATAACTCTCACAATGTTTAC  
ATCATGGCTGACAAACAAAAGAATGGTATCAAAGTTAACTTCAAATTTAGACACAACATTGAAGATGGTCTGTT  
CAATTAGCTGACCATTTATCAACAAAATACTCCAATTGGTGATGGTCCAGTCTTGTACCAGACAACCATTA  
TCCACTCAATCTGCCTTATCCAAAGATCCAAACGAAAAGAGAGACCACATGGTCTTGTAGAAATTTGTTACTGCT  
GCTGGTATTACCCATGGTATGGATGAATTGTATAAAAAGTAGTTAA

>TAG seq2:

TCTAGAATAACTTCGTATAATGTATGCTATACGAAGTTATCAGTGCACATGGCAAGCATGACTGGTGGACAGCAA  
ATGGGTTGTACAATGGCTCCTCCGAGGACGTCATCAAGGAGTTCATGCGCTTCAAGGTGCGCATGGAGGGCTCC  
GTGAACGGCCACGAGTTCGAGATCGAGGGCGAGGGCGAGGGCCGCCCTACGAGGGCACCCAGACCGCCAAGCTG  
AAGGTGACCAAGGGCGGCCCTTCCCTTCCCTGGGACATCCTGTCCCTCAGTTCAGTACGGCTCCAAGGCC  
TACGTGAAGCACCCCGCCGACATCCCCGACTACTTGAAGCTGTCTTCCCGAGGGCTTCAAGTGGGAGCGCGTG  
ATGAACTTCGAGGACGGCGGCGTGGTGACCGTGACCCAGGACTCCTCCCTGCAGGACGGCGAGTTCATCTACAAG  
GTGAAGCTGCGCGGACCAACTTCCCTCCGACGGCCCGTAATGCAGAAGAAGACCATGGGCTGGGAGGCCTCC  
ACCGAGCGGATGTACCCCGAGGACGGCGCCCTGAAGGGCGAGATCAAGATGAGGCTGAAGCTGAAGGACGGCGGC  
CACTACGACGCGGAGTCAAGACCACCTACATGGCCAAGAAGCCCGTGCAGCTGCCCGGCCCTACAAGACCGAC  
ATCAAGCTGGACATCACCTCCCACAACGAGGACTACACCATCGTGAACAGTACGAGCGCGCCGAGGGCCGCCAC  
TCCACCGGCGCCAAGCTTTTGTCCCTTTAGTGAGGGTTAATTTGAGCTTGGCGTAATCATGGTCATAGCTGTT  
TCCTGTGTGAAATTTGTTATCCGC

pKV016

>TAG seq1:

GGTGGATCTGGTGGATCTATAACTTCGTATAATGTATGCTATACGAAGTTATCAGGTACCTACCCATACGATGTT  
CCTGACTATGCGCATAGCTATCCCTATGACGTCGGGACTATGCAGGATATCCATATGACGTTCCAGATACGCT  
ACTAGTATGTCTAAAGGTGAAGAATTATTCCTGCTGTTGTCCCAATTTTGGTTGAATTAGATGGTGATGTTAAT  
GGTCACAAATTTTCTGTCTCCGGTGAAGGTGAAGGTGATGCTACTTACGGTAAATTGACCTTAAAATTTATTTGT  
ACTACTGGTAAATTGCCAGTTCCATGGCCAACCTTAGTCACTACTTTAACTTATGGTGTTCATGTTTTTCTAGA  
TACCCAGATCATATGAAACAACATGACTTTTTCAAGTCTGCCATGCCAGAAGTTATGTTCAAGAAAAGAACTATT  
TTTTTCAAAGATGACGTTAACTACAAGACCAGAGCTGAAGTCAAGTTTGAAGGTGATACCTTAGTTAATAGAATC  
GAATTAAGAGGATTTGATTTTAAAGAAGATGGTAACATTTTAGGTACAAAATTGGAATACAACATAACTCTCAC  
AATGTTTACATCATGGCTGACAAACAAAAGAATGGTATCAAAGTTAACTTCAAATTTAGACACAACATTGAAGAT  
GGTCTGTTCATTTAGCTGACCATTTATCAACAAAATACTCCAATTGGTGATGGTCCAGTCTTGTACCAGACAAC  
CATTACTTATCCACTCAATCTGCCTTATCCAAAGATCCAAACGAAAAGAGAGACCACATGGTCTTGTAGAAATTT  
GTTACTGTCTGGTATTACCCATGGTATGGATGAATTGTATAAAAAGTAGTTAA

>TAG seq2:

TCTAGAATAACTTCGTATAATGTATGCTATACGAAGTTATCAGTGCACATGGCAAGCATGACTGGTGGACAGCAA  
ATGGGTTGTACTATGGCTTCTATGACAGGAGGTCAACAGATGGGAGGAATGGCTCAATGACCGGTGGCCAGCAA  
ATGGGATGTACAATGGCTCCTCCGAGGACGTCATCAAGGAGTTCATGCGCTTCAAGGTGCGCATGGAGGGCTCC  
GTGAACGGCCACGAGTTCGAGATCGAGGGCGAGGGCGAGGGCCGCCCTACGAGGGCACCCAGACCGCCAAGCTG  
AAGGTGACCAAGGGCGGCCCTTCCCTTCCCTGGGACATCCTGTCCCTCAGTTCAGTACGGCTCCAAGGCC  
TACGTGAAGCACCCCGCCGACATCCCCGACTACTTGAAGCTGTCTTCCCGAGGGCTTCAAGTGGGAGCGCGTG  
ATGAACTTCGAGGACGGCGGCGTGGTGACCGTGACCCAGGACTCCTCCCTGCAGGACGGCGAGTTCATCTACAAG  
GTGAAGCTGCGCGGACCAACTTCCCTCCGACGGCCCGTAATGCAGAAGAAGACCATGGGCTGGGAGGCCTCC  
ACCGAGCGGATGTACCCCGAGGACGGCGCCCTGAAGGGCGAGATCAAGATGAGGCTGAAGCTGAAGGACGGCGGC  
CACTACGACGCGGAGTCAAGACCACCTACATGGCCAAGAAGCCCGTGCAGCTGCCCGGCCCTACAAGACCGAC  
ATCAAGCTGGACATCACCTCCCACAACGAGGACTACACCATCGTGAACAGTACGAGCGCGCCGAGGGCCGCCAC  
TCCACCGGCGCCAAGCTTTTGTCCCTTTAGTGAGGGTTAATTTGAGCTTGGCGTAATCATGGTCATAGCTGTT  
TCCTGTGTGAAATTTGTTATCCGC

pVM013

>TAG seq1:

GGTGGATCTGGTGGATCTATAACTTCGTATAATGTATGCTATACGAAGTTATCAGGTACCATGGCAAGCATGACT  
GGTGGACAGCAAATGGTACTAGTTAA

>TAG seq2:

TCTAGAATAACTTCGTATAATGTATGCTATACGAAGTTATCAGTGCAGTACCCATACGATGTTCCCTGACTATGCG  
TGTACAATGTCTAAAGGTGAAGAATTATTCCTGCTGTTGTCCCAATTTTGGTTGAATTAGATGGTGATGTTAAT  
GGTCACAAATTTTCTGTCTCCGGTGAAGGTGAAGGTGATGCTACTTACGGTAAATTGACCTTAAAATTTATTTGT

ACTACTGGTAAATTGCCAGTTCCATGGCCAACCTTAGTCACTACTTTAACTTATGGTGTTC AATGTTTTCTAGA  
TACCCAGATCATATGAAACAACATGACTTTTTCAAGTCTGCCATGCCAGAAGGTTATGTTCAAGAAAGAACTATT  
TTTTTCAAAGATGACGGTAACTACAAGACCAGAGCTGAAGTCAAGTTTGAAGGTGATACCTTAGTTAATAGAAATC  
GAATTAAGGATTTGATTTTAAAGAAGATGGTAAACATTTTAGGTCACAAATTGGAATACAACATAACTCTCAC  
AATGTTTACATCATGGCTGACAAACAAAAGAATGGTATCAAAGTTAACTTCAAATTAGACACAACATTGAAGAT  
GGTCTGTTC AATTAGCTGACCATTATCAACAAAATACTCCAATTGGTGTGATGGTCCAGTCTTGTACCAGACAAC  
CATTACTTATCCACTCAATCTGCCTTATCCAAAGATCCAAACGAAAAGAGAGACCACATGGTCTTGTAGAAATTT  
GTTACTGCTGCTGGTATTACCCATGGTATGGATGAATTGTATAAATAAAAAAGCTTTTGTCCCTTTAGTGAGGG  
TTAATTCCGAGCTTGGCGTAATCATGGTCATAGCTGTTTCCTGTGTGAAATTTGTTATCCGC

pFVL106

>TAG seq1:

GGTGGATCTGGTGGATCTATAACTTCGTATAATGTATGCTATACGAAGTTATCAGGTACCTACCCATACGATGTT  
CCTGACTATGCGACTAGTTAA

>TAG seq2:

TCTAGAATAACTTCGTATAATGTATGCTATACGAAGTTATCAGTTCGACATGGCAAGCATGACTGGTGGACAGCAA  
ATGGGTTGTACATAAGCGGCCGCGCATGCAAGCTTTTGTTCCTTTAGTGAGGGTTAATTTCCGAGCTTGGCGTAA  
TCATGGTCATAGCTGTTTCCTGTGTGAAATTTGTTATCCGC

pFVL118

>TAG seq1:

GGTGGATCTGGTGGATCTATAACTTCGTATAATGTATGCTATACGAAGTTATCAGGTACCTACCCATACGATGTT  
CCTGACTATGCGACTAGTTAA

>TAG seq2:

TCTAGAATAACTTCGTATAATGTATGCTATACGAAGTTATCAGTTCGACATGGCAAGCATGACTGGTGGACAGCAA  
ATGGGTTGTACATAAGCGGCCGCGAATTCGAGCTCGGTACCCGGGGATCCTCTAGAGTCGACCTGCAGGCATGCA  
AGCTTTTGTTCCTTTAGTGAGGGTTAATTTCCGAGCTTGGCGTAAATCATGGTCATAGCTGTTTCCTGTGTGAAAT  
TGTATCCGC

pFVL119

>TAG seq1:

GGTGGATCTGGTGGATCTATAACTTCGTATAATGTATGCTATACGAAGTTATCAGGTACCTACCCATACGATGTT  
CCTGACTATGCGACTAGTTAA

>TAG seq2:

TCTAGAATAACTTCGTATAATGTATGCTATACGAAGTTATCAGTTCGACATGGCAAGCATGACTGGTGGACAGCAA  
ATGGGTTGTACATAAGCGGCCGCGCATGCAAGCTTTTGTTCCTTTAGTGAGGGTTAATTTCCGAGCTTGGCGTAA  
TCATGGTCATAGCTGTTTCCTGTGTGAAATTTGTTATCCGC

pFVL160

>TAG seq1:

GGTGGATCTGGTGGATCTATAACTTCGTATAATGTATGCTATACGAAGTTATCAGGTACCTACCCATACGATGTT  
CCTGACTATGCGACTAGCTATCCCTATGACGTCGCCGACTATGCAGGATATCCATATGACGTTCCAGATTACGCT  
ACTAGTTAA

>TAG seq2:

TCTAGAATAACTTCGTATAATGTATGCTATACGAAGTTATCAGTTCGACATGGCAAGCATGACTGGTGGACAGCAA  
ATGGGTTGTACTATGGCTTCTATGACAGGAGGTCAACAGATGGGAGGAATGGCTCAATGACCGGTGGCCAGCAA  
ATGGGATGTACATAAGCGGCCGCGCATGCAAGCTTTTGTTCCTTTAGTGAGGGTTAATTTCCGAGCTTGGCGTAA  
TCATGGTCATAGCTGTTTCCTGTGTGAAATTTGTTATCCGC

pTW073

>TAG seq1:

GGTGGATCTGGTGGATCTATAACTTCGTATAATGTATGCTATACGAAGTTATCAGGTACCTACCCATACGATGTT  
CCTGACTATGCGACTAGTTAA

>TAG seq2:

TCTAGAATAACTTCGTATAATGTATGCTATACGAAGTTATCAGTTCGACGGTAAGCCTATCCCTAACCTCTCCTC  
GGTCTCGATTCTTGTACATAAGCGGCCGCGAATTC AATTCGAGCTCGGTACCCGGGGATCCTCTAGAGTCGACCT  
GCAGGCATGCAAGCTTTTGTTCCTTTAGTGAGGGTTAATTTCCGAGCTTGGCGTAAATCATGGTCATAGCTGTTTC  
CTGTGTGAAATTTGTTATCCGC

pTW081

>TAG seq1:  
GGTGGATCTGGTGGATCTATAACTTCGTATAATGTATGCTATACGAAGTTATCAGGTACCATGGCAAGCATGACT  
GGTGGACAGCAAATGGGTACTAGTTAA

>TAG seq2:  
TCTAGAATAACTTCGTATAATGTATGCTATACGAAGTTATCAGTCGACTACCCATACGATGTTCCCTGACTATGCG  
TGTACATAAGCGGCCGCGAATTC AATTCGAGCTCGGTACCCGGGGATCCTCTAGAGTCGACCTGCAGGCATGCAA  
GCTTTTGTTCCTTTAGTGAGGGTTAATTCGAGCTTGGCGTAATCATGGTCATAGCTGTTTCCTGTGTGAAATT  
GTTATCCGC

pTW087

>TAG seq1:  
GGTGGATCTGGTGGATCTATAACTTCGTATAATGTATGCTATACGAAGTTATCAGGTACCTACCCATACGATGTT  
CCTGACTATGCGCACCATCATCACCATCACACTAGTTAA

>TAG seq2:  
TCTAGAATAACTTCGTATAATGTATGCTATACGAAGTTATCAGTCGACATGGCAAGCATGACTGGTGGACAGCAA  
ATGGGTTGTACATAAGCGGCCGCGAATTC AATTCGAGCTCGGTACCCGGGGATCCTCTAGAGTCGACCTGCAGGC  
ATGCAAGCTTTTGTTCCTTTAGTGAGGGTTAATTCGAGCTTGGCGTAATCATGGTCATAGCTGTTTCCTGTGT  
GAAATTGTTATCCGC

pTW094

>TAG seq1:  
GGTGGATCTGGTGGATCTATAACTTCGTATAATGTATGCTATACGAAGTTATCAGGTACCATGGCAAGCATGACT  
GGTGGACAGCAAATGGGTACTAGTTAA

>TAG seq2:  
TCTAGAATAACTTCGTATAATGTATGCTATACGAAGTTATCAGGAACTTACCCATACGATGTTCCCTGACTATGCG  
CACCATCATCACCATCACACTAGTTAATGTACATAAGCGGCCGCGAATTCGAGCTCGGTACCCGGGGATCCTCTA  
GAGTCGACCTGCAGGCATGCAAGCTTTTGTTCCTTTAGTGAGGGTTAATTCGAGCTTGGCGTAATCATGGTCA  
TAGCTGTTTCCTGTGTGAAATTGTTATCCGC

pMT001

>TAG seq1:  
GGTGGATCTGGTGGATCTATAACTTCGTATAATGTATGCTATACGAAGTTATCAGGTACCTACCCATACGATGTT  
CCTGACTATGCGCACCATCATCACCATCACACTAGTTAA

>TAG seq2:  
TCTAGAATAACTTCGTATAATGTATGCTATACGAAGTTATCAGTCGACGGTAAGCCTATCCCTAACCCTCTCCTC  
GGTCTCGATTCTTGTACATAAGCGGCCGCGAATTC AATTCGAGCTCGGTACCCGGGGATCCTCTAGAGTCGACCT  
GCAGGCATGCAAGCTTTTGTTCCTTTAGTGAGGGTTAATTCGAGCTTGGCGTAATCATGGTCAATAGCTGTTTC  
CTGTGTGAAATTGTTATCCGC

pMT004

>TAG seq1:  
GGTGGATCTGGTGGATCTATAACTTCGTATAATGTATGCTATACGAAGTTATCAGGTACCGGTAAGCCTATCCCT  
AACCCTCTCCTCGGTCTCGATTCTACTAGTTAA

>TAG seq2:  
TCTAGAATAACTTCGTATAATGTATGCTATACGAAGTTATCAGGAACTTACCCATACGATGTTCCCTGACTATGCG  
CACCATCATCACCATCACACTAGTTAATGTACATAAGCGGCCGCGAATTCGAGCTCGGTACCCGGGGATCCTCTA  
GAGTCGACCTGCAGGCATGCAAGCTTTTGTTCCTTTAGTGAGGGTTAATTCGAGCTTGGCGTAATCATGGTCA  
TAGCTGTTTCCTGTGTGAAATTGTTATCCGC

pMT005

>TAG seq1:  
GGTGGATCTGGTGGATCTATAACTTCGTATAATGTATGCTATACGAAGTTATCAGGTACCATGGCTTCTATGACA  
GGAGGTCAACAGATGATGGCAAGCATGACTGGTGGACAGCAAATGACTAGTTAA

>TAG seq2:  
TCTAGAATAACTTCGTATAATGTATGCTATACGAAGTTATCAGGAACTTACCCATACGATGTTCCCTGACTATGCG  
CACCATCATCACCATCACACTAGTTAATGTACATAAGCGGCCGCGAATTCGAGCTCGGTACCCGGGGATCCTCTA  
GAGTCGACCTGCAGGCATGCAAGCTTTTGTTCCTTTAGTGAGGGTTAATTCGAGCTTGGCGTAATCATGGTCA  
TAGCTGTTTCCTGTGTGAAATTGTTATCCGC

pMT006

>TAG seq1:  
GGTGGATCTGGTGGATCTATAA<sup>CTTCGTATAATGTATGCTATACGAAGTTATCAGGTACCGACTACAAGGACGAT</sup>  
GACGATAAAGATTATAAAGATGACGATGACAAGACTAGTTAA

>TAG seq2:  
TCTAGAATAACTTCGTATAATGTATGCTATACGAAGTTATCAGGAAC<sup>TTACCCATACGATGTTCCCTGACTATGCG</sup>  
CACCATCATCACCATCACACTAGTTAATGTACATAAGCGGCCGGAATTCGAGCTCGGTACCCGGGGATCCTCTA  
GAGTCGACCTGCAGGCATGCAAGCTTTTGTTCCTTTAGTGAGGGTTAATTCGAGCTTGGCGTAATCATGGTCA  
TAGCTGTTTCCTGTGTGAAATTGTTATCCGC

pMT010

>TAG seq1:  
GGTGGATCTGGTGGATCTATAA<sup>CTTCGTATAATGTATGCTATACGAAGTTATCAGGTACCTACCCATACGATGTT</sup>  
CCTGACTATGCGACTAGTTAA

>TAG seq2:  
TCTAGAATAACTTCGTATAATGTATGCTATACGAAGTTATCAGTCGACGACTACAAGGACGATGACGATAAAGAT  
TATAAAGATGACGATGACAAGTGTACATAAGCGGCCGCGCATGCAAGCTTTTGTTCCTTTAGTGAGGGTTAAT  
TCGAGCTTGGCGTAATCATGGTCTAGCTGTTTCCTGTGTGAAATTGTTATCCGC

RITE Plasmid backbone

>pVZ1 (underlined sequences indicate overlap with RITE cassette inserts)  
TCCTGTGTGAAATTGTTATCCGCTCACAATTCCACACAACATACGAGCCGGAAGCATAAAAGTGTAAGCCTGGGG  
TGCCTAATGAGTGAGCTAACTCACATTAATTGCGTTGCGCTCACTGCCGCTTTCCAGTCGGGAAACCTGTGCTG  
CCAGCTGCATTAATGAATCGGCCAACGCGGGGAGAGGCGGTTTGCCTATTGGGCGCTCTCCGCTTCCTCGCT  
CACTGACTCGCTGCGCTCGGTCGTTCCGGCTGCGGCGAGCGGTATCAGCTCACTCAAAGGCGGTAATACGGTTATC  
CACAGAATCAGGGGATAACGCAGGAAAGAACATGTGAGCAAAAGGCCAGCAAAAGGCCAGGAACCGTAAAAAGGC  
CGCGTTGCTGGCGTTTTTCCATAGGCTCCGCCCCCTGACGAGCATCACAAAAATCGACGCTCAAGTCAGAGGTG  
GCGAAACCCGACAGGACTATAAAGATAACCAGGCGTTTTCCCCCTGGAAGCTCCCTCGTGCGCTCTCCTGTTCCGAC  
CCTGCCGCTTACCGGATACTGTCCGCTTTCTCCCTTCGGGAAGCGTGGCGCTTTCTCATAGCTACGCTGTAG  
GTATCTCAGTTTCGGTGTAGGTCGTTCCGCTCCAAGCTGGGCTGTGTGCACGAACCCCGTTACGCCGACCCGCTG  
CGCCTTATCCGGTAACTATCGTCTTGAGTCCAACCCGGTAAGACACGACTTATCGCCACTGGCAGCAGCCACTGG  
TAACAGGATTAGCAGAGCGAGGTATGTAGGCGGTGCTACAGAGTTCTTGAAGTGGTGGCCTAACTACGGCTACAC  
TAGAAGGACAGTATTTGGTATCTGCGCTCTGCTGAAGCCAGTTACCTTCGGAAAAAGAGTTGGTAGCTCTTGATC  
CGGCAACAACCACCGCTGGTAGCGGTGGTTTTTTTTGTTTGAAGCAGCAGATTACGCGCAGAAAAAAGGATC  
TCAAGAAGATCCTTTGATCTTTTCTACGGGGTCTGACGCTCAGTGGAACGAAAACCTCACGTTAAGGATTTTGGT  
CATGAGATTATCAAAAAGGATCTTACCTAGATCCTTTTTAAATTAATAATGAAGTTTTAAATCAATCTAAAAGTAT  
ATATGAGTAACTTGGTCTGACAGTTACCAATGCTTAATCAGTGAGGCACCTATCTCAGCGATCTGTCTATTTG  
TTCAATCCATAGTTGCCGACTCCCCGTCGTGTAGATAACTACGATACGGGAGGGCTTACCATCTGGCCCCAGTGC  
TGCAATGATACCGGAGACCCACGCTCACCGGCTCCAGATTTATCAGCAATAAACAGCCAGCCGGAAGGGCCGA  
GCGCAGAAGTGGTCCGCAACTTTATCCGCCTCCATCCAGTCTATTAATTGTTGCCGGGAAGCTAGAGTAAGTAG  
TTCCGCAAGTTAATAGTTTGCGCAACGTTGTTGCCATTGCTACAGGCATCGTGGTGTACGCTCGTCGTTGGTAT  
GGCTTCATTACGCTCCGGTTCCCAACGATCAAGGCGAGTTACATGATCCCCATGTTGTGCAAAAAAGCGGTTAG  
CTCCTTCGGTCCCTCCGATCGTTGTGAGAAGTAAAGTTGGCCGAGTGTATCACTCATGGTTATGGCAGCACTGCA  
TAATTTCTTACTGTATGCCATCCGTAAGATGCTTTTCTGTGACTGGTACTCAACCAAGTCAATCTGAGA  
ATAGTGTATGCGGCGACCGAGTTGCTCTTGCCCGGCGTCAATACGGGATAATACCGCGCCACATAGCAGAACTTT  
AAAAGTGCTCATCATTTGAAAACGTTCTTCGGGGCGAAAACCTCTCAAGGATCTTACCGCTGTTGAGATCCAGTTC  
GATGTAACCCACTCGTGCACCCAACGATCTTCAGCATCTTTACTTTTACCAGCGTTTCTGGGTGAGCAAAAAAC  
AGGAAGGCAAAATGCCGCAAAAAAGGGAATAAGGGCGACACGGAATGTTGAATACTCATACTCTTCTTTTCA  
ATATTATTGAAGCATTTATCAGGGTTATTGTCTCATGAGCGGATACATATTTGAATGATTTAGAAAAATAAACA  
AATAGGGGTTCCGCGCACATTTCCCCGAAAAGTGCCACCTGACGCTAAGAAAACCATTAATATCATGACATTAAC  
CTATAAAAATAGGCGTATCACGAGGCCCTTTCGCTCGCGCGTTTCCGGTATGACGGTAAAACCTCTGACACAT  
GCAGCTCCCGGAGACGGTACAGCTTGTCTGTAAGCGGATGCCGGGAGCAGACAAGCCGTCAGGGCGCGTCAGC  
GGGTGTTGGCGGGTTCGGGGCTGGCTTAACATGCGGCATCAGAGCAGATTGTAAGTACTGAGAGTGCACCATATGCG  
GTGTGAAATACCGCACAGATGCGTAAGGAGAAAATACCGCATCAGGAAATGTAAACGTTAATATTTTGTAAAAA  
TTCCGCTTAAATTTTTGTTAAATCAGCTCATTTTTTAAACCAATAGGCCGAAAATCGGCAAAATCCCTTATAAATCA  
AAAGAATAGACCGAGATAGGGTTGAGTGTGTTCCAGTTTGGAAACAAGAGTCCACTATTAAGAACGTTGGACTCC  
AACGTCAAAGGGCGAAAAACCGTCTATCAGGGCGATGGCCCACTACGTTGAACCATCACCCCTAATCAAGTTTTTTG  
GGGTGAGGTTGCCGTAAGCACTAAATCGGAACCCCTAAAGGGAGCCCGGATTTAGAGCTTGACGGGGAAGCCG  
GCGAACGTGGCGAGAAAGGAAGGAAGAAAGCGAAAGGAGCGGGCGCTAGGGCGCTGGCAAGTGTAGCGGTACG  
CTGCGGTAACCACACCCCGCCGCTTAATGCGCGCTACAGGGCGCTCGCGCCATTCCGCATTCAGGCTG  
CGCAACTGTTGGGAAGGGCGATCGGTGCGGGCTTTCGCTATTACGCCAGCTGGCGAAAGGGGGATGTGCTGCA

AGGCGATTAAGTTGGGTAACGCCAGGGTTTTCCCAGTCACGACGTTGTAAAACGACGGCCAGTGAATTGTAATAC  
GACTCACTATAGGGCGAATTGGGCCCAATGCATTGGCGCCGCGGCCGCGTGGATCTGGTGGATCT
